# Supplementary material for: Solution-processed 2-dimensional hole-doped ionic graphene compounds
Source: Royal Society of Chemistry journal article supplement (doi:10.1039/c7mh00068e), 2017-01-01
Supplement: c7mh00068e2.pdf [file c7mh00068e2.pdf]

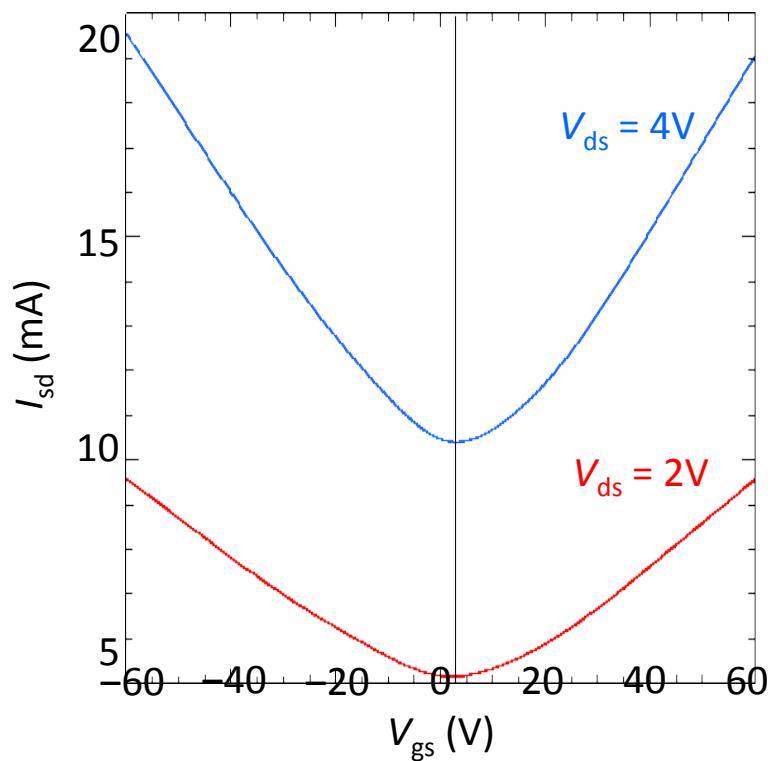

**Supplementary Figure 1. Typical field-effect characteristics of a single CVD graphene sheet.** Channel length, 40  $\mu\text{m}$ ; channel width, 1.2  $\mu\text{m}$ ; gate dielectric capacitance, 11.5  $\text{nF cm}^{-2}$ . Gate dielectric, hexamethyldisilazane-treated 300-nm-thick  $\text{SiO}_2/\text{Si}$  wafers. Back gate,  $p^+$ -doped Si; source–drain array, lithographically-patterned Au. Vertical line marks the neutrality point at +3 V.

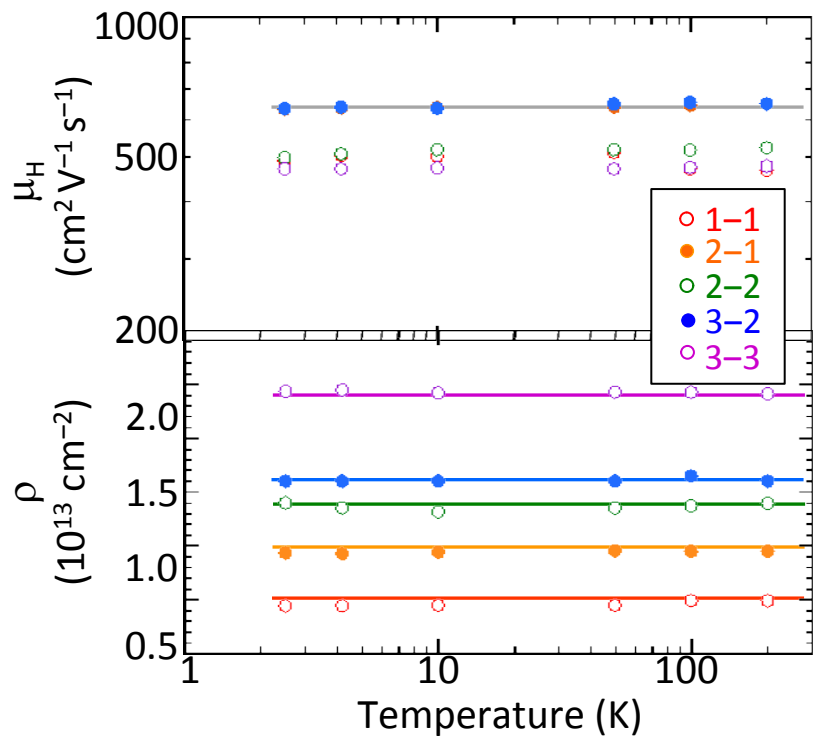

**Supplementary Figure 2. Temperature dependence of Hall mobility ( $\mu_H$ ) and total hole density ( $\rho$ ) for alternating graphene- $C_{60}F_{48}$  stacks.** Stack index  $n-m$  gives number of G sheets  $n$  and A monolayers  $m$ .

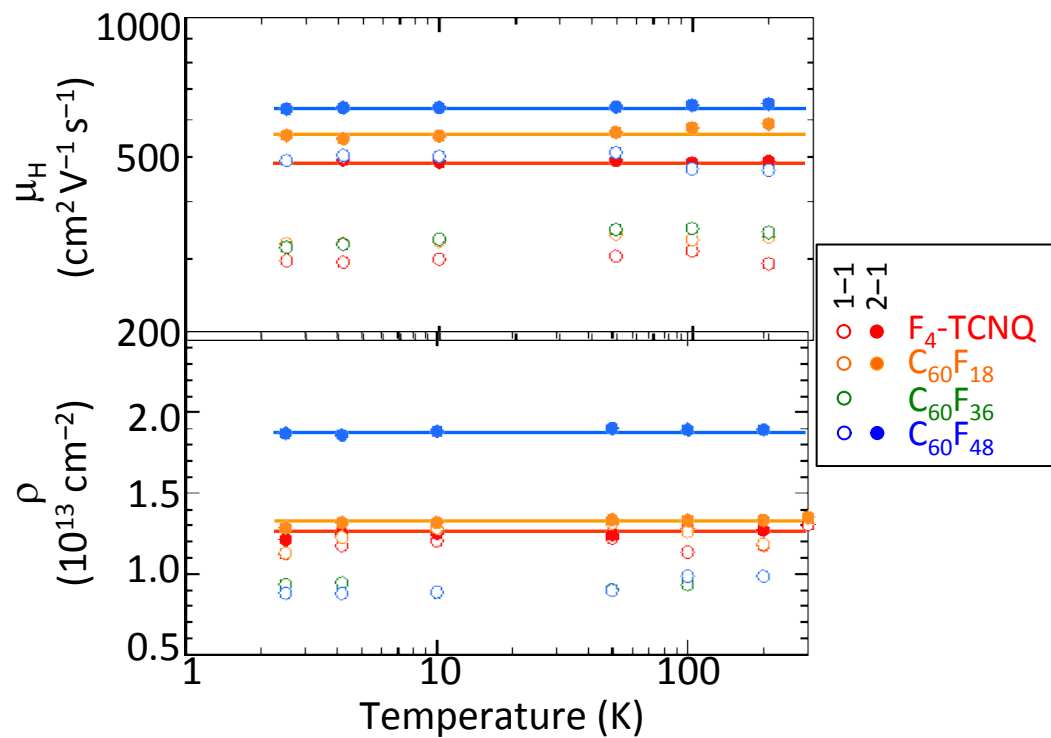

**Supplementary Figure 3. Temperature dependence of Hall mobility ( $\mu_H$ ) and total hole density ( $\rho$ ) for graphene-acceptor stacks.** Acceptors include  $\text{C}_{60}\text{F}_{48}$ ,  $\text{C}_{60}\text{F}_{36}$ ,  $\text{C}_{60}\text{F}_{18}$  and  $\text{F}_4\text{-TCNQ}$ , for stack index 1-1 and 2-1.

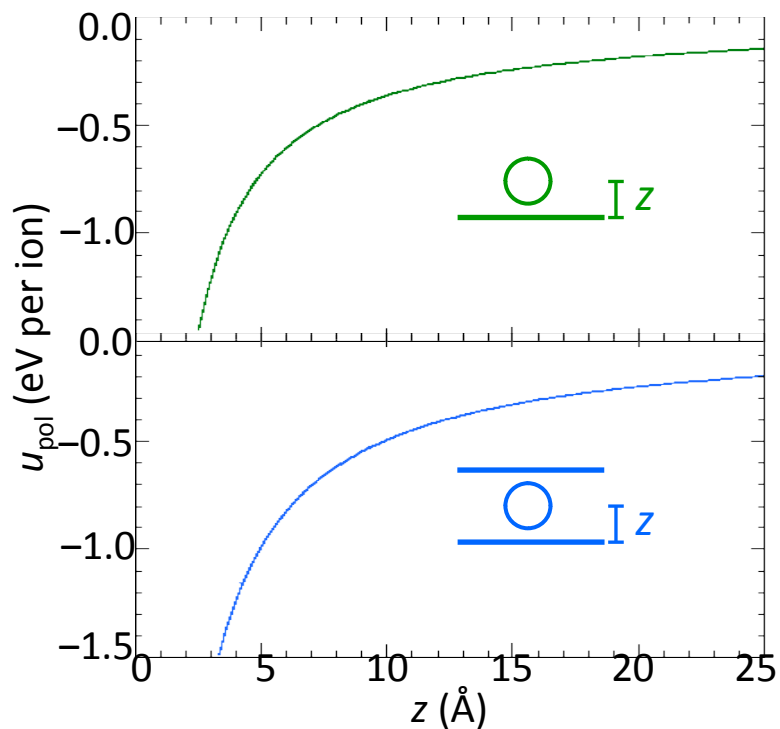

**Supplementary Figure 4. Electrostatic polarization energy in graphene/ dopant assemblies.** Electrostatic polarization  $u_{\text{pol}}$ , computed for a singly-charged non-polarizable dopant ion located above a grounded perfectly-conducting sheet (top) or in a symmetrical sandwich between two grounded perfectly-conducting sheets (bottom). These two configurations represent the Coulomb interaction between the ionized acceptor and the hole in the graphene sheet.  $u_{\text{pol}}$  is obtained as the difference in electrostatic field energy for the free ion and when it is in the stated configuration, as a function of distance from ion center to conducting sheet mid-plane  $z$ . Vacuum permittivity is assumed in the space between the conducting sheets. For G/  $\text{C}_{60}\text{F}_{48}$ , the relevant  $z \approx 8.3$  Å. Negative energy corresponds to stabilization. Computation method is given in Supplementary Information S2.

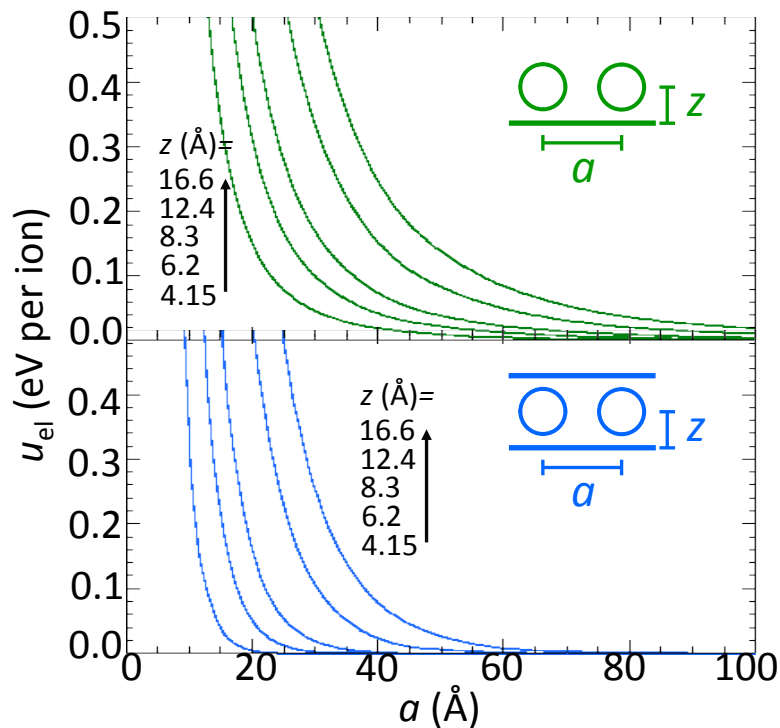

**Supplementary Figure 5. Ion-ion Coulomb interaction energy in graphene/ dopant assemblies.** Mutual Coulomb interaction energy between singly-charged dopant ions located above a grounded perfectly-conducting sheet (top) or in a symmetrical sandwich between two grounded perfectly-conducting sheets (bottom). The array of ions are assumed to be distributed in a hexagonal lattice with primitive unit cell constant  $a$  for different ion center-to-conducting sheet mid-plane distance  $z$ . Nearly hard wall-like repulsion is observed with onset at  $a \approx 6z$  and  $3z$  in the surface and sandwich configurations, respectively. Positive energy corresponds to destabilization. Computation method is given in Supplementary Information S2.
