# Supplementary material for: Solution-processed 2-dimensional hole-doped ionic graphene compounds
Source: Royal Society of Chemistry journal article supplement (doi:10.1039/c7mh00068e), 2017-01-01
Supplement: c7mh00068e3.pdf [file c7mh00068e3.pdf]

|                                       | G/ C <sub>60</sub> F <sub>48</sub> (Ω) | (G/ C <sub>60</sub> F <sub>48</sub> ) <sub>2</sub> (Ω) |
|---------------------------------------|----------------------------------------|--------------------------------------------------------|
| /Start                                | 127                                    | 42                                                     |
| 50°C, N <sub>2</sub> , 15 min         | 123                                    | 41                                                     |
| 100°C, N <sub>2</sub> , 15 min        | 127                                    | 37                                                     |
| 150°C, N <sub>2</sub> , 15 min        | 112                                    | 38                                                     |
| 200°C, N <sub>2</sub> , 15 min        | 156                                    | 48                                                     |
| 22°C, 60%RH air, 3 h                  | 148                                    | 47                                                     |
| 22°C, 60%RH air, 20 h                 | 136                                    | 49                                                     |
| 150°C, 60%RH air, <sup>a</sup> 15 min | 133                                    | 46                                                     |
| 150°C, 95%RH air, <sup>a</sup> 15 min | 133                                    | 48                                                     |
| End                                   | 133                                    | 48                                                     |

#### Footnote

<sup>a</sup> RH = relative humidity of ambient air (22°C) flowed into chamber. Sample on heated plate.

**Supplementary Table 1.** Resistance in Ohms of G/ C<sub>60</sub>F<sub>48</sub> and (G/ C<sub>60</sub>F<sub>48</sub>)<sub>2</sub> assemblies on 300-nm thick SiO<sub>2</sub>/ Si wafers, taken sequentially through different treatments. All resistance measurements were performed in N<sub>2</sub> at 22°C. The robustness of these samples to brief heating in both N<sub>2</sub> and even wet ambient air is evident.

|                                   | Theory    |           | Experiment                                                |
|-----------------------------------|-----------|-----------|-----------------------------------------------------------|
|                                   | 6-311g(d) | 6-31g+(d) |                                                           |
| Ionization potential              |           |           |                                                           |
| C <sub>60</sub>                   | 7.65      | 7.64      | 7.61 ±0.06                                                |
| C <sub>60</sub> F <sub>18</sub>   | 9.0       | 9.06      |                                                           |
| C <sub>60</sub> F <sub>36</sub>   | 11.3      | 11.46     |                                                           |
| C <sub>60</sub> F <sub>48</sub>   | 12.0      | 12.2      | 12.3 ±0.1{Steger, 1997 #72}                               |
| F <sub>4</sub> -TCNQ              | 9.24      | 9.32      |                                                           |
| 1 <sup>st</sup> electron affinity |           |           |                                                           |
| C <sub>60</sub>                   | 2.64      | 2.64      | 2.67 ±0.02                                                |
| C <sub>60</sub> F <sub>18</sub>   | 3.02      | 3.09      |                                                           |
| C <sub>60</sub> F <sub>36</sub>   | 3.23      | 3.42      |                                                           |
| C <sub>60</sub> F <sub>48</sub>   | 3.74      | 4.00      | 4.06 ±0.3<br>(adiabatic){Jin, 1994 #5; Hettich, 1994 #65} |
| F <sub>4</sub> -TCNQ              | 4.47      | 4.56      |                                                           |
| 2 <sup>nd</sup> electron affinity |           |           |                                                           |
| C <sub>60</sub>                   | <0        | <0        | <0                                                        |
| C <sub>60</sub> F <sub>18</sub>   | <0        | 0.08      |                                                           |
| C <sub>60</sub> F <sub>36</sub>   | 0.61      | 0.86      |                                                           |
| C <sub>60</sub> F <sub>48</sub>   | 1.82      | 2.13      |                                                           |
| F <sub>4</sub> -TCNQ              | 0.12      | 0.33      |                                                           |

**Supplementary Table 2.** Computed values are for vertical transitions. 6-311g(d) is sufficient to predict  $E_A$  accurately for C<sub>60</sub>. Diffuse functions not required. The adiabatic  $E_A$  can be evaluated as the mean of the vertical  $E_A$ s computed at the ground-state geometry of the initial state and of the final state. For C<sub>60</sub>, the adiabatic  $E_A$  is 0.09 eV larger than the vertical  $E_A$  for the initial ground-state geometry. For C<sub>60</sub>F<sub>48</sub>, this is ca. 0.2 eV; for C<sub>60</sub>F<sub>48</sub><sup>-</sup>, 0.3 eV; for C<sub>60</sub>F<sub>36</sub>, 0.08 eV; for C<sub>60</sub>F<sub>18</sub>, 0.14 eV; for F<sub>4</sub>-TCNQ, 0.17 eV. The results converge to yield the  $I_p$  of C<sub>60</sub>F<sub>48</sub> at 12.1 eV (expt, 12.3±0.1 eV){Steger, 1997 #72}, first adiabatic  $E_A$  at 4.0–4.3 eV (expt, 4.06±0.3 eV){Jin, 1994 #5}
